# Supplementary material for: Opioid Injection-Associated Bacterial Infections in England, 2002–2021: A Time Series Analysis of Seasonal Variation and the Impact of Coronavirus Disease 2019
Source: PubMed Central journal article supplement — Clin Infect Dis. 2023 Mar 14;77(3):338–45. doi: 10.1093/cid/ciad144 (PMC10425189; doi:10.1093/cid/ciad144), 2023-03-14
Supplement: ciad144_supplementary_data.pdf [file ciad144_supplementary_data.pdf]

## Supplementary material

|                                                                                                                                                                                                        |    |
|--------------------------------------------------------------------------------------------------------------------------------------------------------------------------------------------------------|----|
| 1. Non-pharmaceutical responses to COVID-19 in England.....                                                                                                                                            | 2  |
| 2. ICD-10 codes for hospital admissions included in the study .....                                                                                                                                    | 3  |
| 3. Flow-chart of data included in the study .....                                                                                                                                                      | 5  |
| 4. Proportion of opioid injecting-associated infections that have a secondary diagnosis of opioid dependence.....                                                                                      | 6  |
| 5. Histogram of age at admission.....                                                                                                                                                                  | 7  |
| 6. Characteristics of hospital admissions, stratified by infection type .....                                                                                                                          | 8  |
| 7. Characteristics of hospital admissions, stratified by year of admission .....                                                                                                                       | 10 |
| 8. Comparison between time trends in hospital admissions and time trends in drug-related deaths .....                                                                                                  | 13 |
| 9. Additional figures describing the distribution of patient age .....                                                                                                                                 | 14 |
| 10. Figures for time series analyses of invasive infections, skin infections unrelated to opioids, poisoning due to illicit drugs, and mental and behavioural disorders related to illicit drugs ..... | 15 |
| 11. Coefficients from time series analysis .....                                                                                                                                                       | 17 |
| 12. References for supplementary material.....                                                                                                                                                         | 18 |

## 1. Non-pharmaceutical responses to COVID-19 in England

In the UK, non-pharmaceutical interventions included:

- a) Restrictions on movement and closure of schools, workplaces, and non-essential services ('lockdown'), which were announced on 23 March 2020, gradually lifted during summer 2020, and reintroduced between November 2020 and spring 2021;
- b) International travel bans, which operated intermittently using a 'traffic light' system in which travel to and from countries was restricted based on the prevalence of COVID-19;
- c) Behavioural advice, including promotion of handwashing, physical distancing, and face coverings;
- d) Support for vulnerable groups such as the 'Everyone In' scheme, which provided hotel and other temporary accommodation for people experiencing homelessness.

Further information about non-pharmaceutical interventions in the UK is available at:

- The UK Department for Health and Social Care's report on COVID-19 non-pharmaceutical interventions.<sup>1</sup>
- The Institute for Government's 'timeline of UK government coronavirus lockdowns and restrictions'.<sup>2</sup>
- Data and information about the 'Everyone In' scheme.<sup>3</sup>
- Information about the 'traffic light' system for international travel.<sup>4</sup>

## 2. ICD-10 codes for hospital admissions included in the study

We used the primary (first-listed) diagnosis to classify infections. Diagnoses were classified using the International Classification of Diseases version 10 (ICD-10).<sup>5</sup> The codes for infections are shown in Table 1. Algorithms for admissions included in the study are shown in Table 2.

Table 1: ICD-10 codes for bacterial infections

| Localized or invasive | Infection focus                      | ICD-10 codes | Description of codes                                   |      |                                                                         |
|-----------------------|--------------------------------------|--------------|--------------------------------------------------------|------|-------------------------------------------------------------------------|
| Localized             | Cutaneous abscess                    | L02*         | Cutaneous abscess, furuncle and carbuncle              |      |                                                                         |
|                       |                                      | L03*         | Cellulitis                                             |      |                                                                         |
|                       |                                      | A480         | GAS gangrene (GAS = group A streptococcus)             |      |                                                                         |
|                       |                                      | L08*         | Other local infections of skin and subcutaneous tissue |      |                                                                         |
|                       |                                      | L97*         | Ulcer of lower limb, not elsewhere classified          |      |                                                                         |
|                       |                                      | L984         | Chronic ulcer of skin, not elsewhere classified        |      |                                                                         |
| Localized             | Other skin and soft tissue infection | R02*         | Gangrene, not elsewhere classified                     |      |                                                                         |
|                       |                                      | I80*         | Phlebitis and thrombophlebitis                         |      |                                                                         |
|                       |                                      | Invasive     | Endocarditis                                           | B376 | Candidal endocarditis                                                   |
|                       |                                      |              |                                                        | I33* | Acute and subacute endocarditis                                         |
|                       |                                      |              |                                                        | I38* | Endocarditis, valve unspecified                                         |
|                       |                                      |              |                                                        | I39* | Endocarditis and heart valve disorders in diseases classified elsewhere |
| Invasive              | Septicaemia                          | A40*         | Streptococcal sepsis                                   |      |                                                                         |
|                       |                                      | A41*         | Other sepsis                                           |      |                                                                         |
|                       |                                      | B377         | Candidal sepsis                                        |      |                                                                         |
|                       |                                      | R572         | Septic shock                                           |      |                                                                         |
| Invasive              | Osteomyelitis and septic arthritis   | M00-M03      | Infectious arthropathies                               |      |                                                                         |
|                       |                                      | M86          | Osteomyelitis                                          |      |                                                                         |
|                       |                                      | M465         | Other infective spondylopathies                        |      |                                                                         |
| Invasive              | Necrotising fasciitis                | M726         | Necrotizing fasciitis                                  |      |                                                                         |

Table 2: Definitions of emergency hospital admissions included in the study

| Cause of hospital admission                                                                                                         | Primary diagnosis                                 | Secondary diagnosis                                                                                                                                                                                                                                                      |
|-------------------------------------------------------------------------------------------------------------------------------------|---------------------------------------------------|--------------------------------------------------------------------------------------------------------------------------------------------------------------------------------------------------------------------------------------------------------------------------|
| Opioid-injection associated bacterial infection                                                                                     | Bacterial infections (see Table 1)                | F11* (Mental and behavioural disorders due to use of opioids)                                                                                                                                                                                                            |
| Non opioid-related streptococcal and staphylococcal skin infections                                                                 | L* (Diseases of the skin and subcutaneous tissue) | B950-5 (Streptococcus group A / group B / group D / pneumonia / other / unspecified as the cause of diseases classified to other chapters)<br>B956-8 (Staphylococcus aureus / other / unspecified as the cause of diseases classified to other chapters)<br>But NOT F11* |
| Admissions for drug-related mental and behavioural disorders<br>Hospital admissions related to drug misuse (measure 1) <sup>6</sup> | F11-F16, F18, F19                                 | Any                                                                                                                                                                                                                                                                      |
| Admissions for poisoning by drug misuse<br>Hospital admissions related to drug misuse (measure 2) <sup>6</sup>                      | T400-9; T436                                      | Any                                                                                                                                                                                                                                                                      |

### 3. Flow-chart of data included in the study

We used data from the Hospital Episode Statistics database, which includes 'finished consultant episodes' from National Health Service hospitals in England.<sup>7</sup> A 'finished consultant episode' is an episode of care within a hospital led by a specific doctor and specialty. We defined admissions as episodes where EPIORDER = 1 (ie. we only included the first episode within a continuous spell to avoid double-counting of admissions) and EPISTAT = 3 (ie. the episode is 'finished' rather than ongoing). A flow chart showing how we derived the study sample is shown in Figure 1.

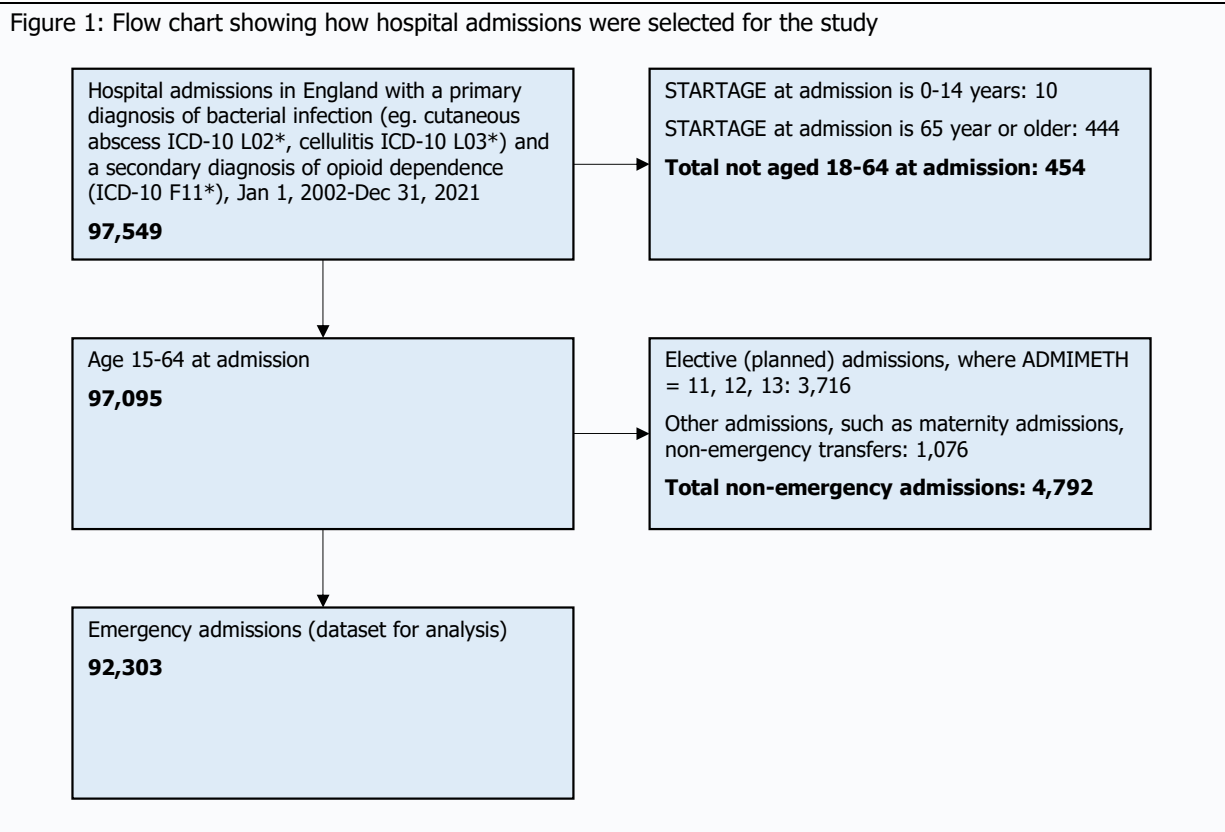

#### 4. Proportion of opioid injecting-associated infections that have a secondary diagnosis of opioid dependence

In this study, we defined hospital admissions due to opioid-injection related bacterial infections as those with a primary diagnosis of a bacterial infection, and a secondary diagnosis of F11 (mental health behavioural disorders due to opioids).

We tested the sensitivity of this definition using data from a cohort study of individuals identified as having opioid use disorder in primary care practices. Linked data from hospitals was available for this cohort. We could therefore calculate the proportion of hospital admissions with a diagnosis of bacterial infection where the diagnosis F11 was reported. This is shown in the table below.<sup>8,9</sup> Approximately half of admissions had a secondary diagnosis of opioid dependence, and this proportion was consistent over time.

Table 3: Number of hospital admissions due to bacterial infections in the "HUPIO" cohort, and the proportion with a secondary diagnosis of opioid dependence

| Year  | Admissions with a primary diagnosis of bacterial infections in the cohort | Number with a secondary diagnosis of opioid dependence (F11) | %    |
|-------|---------------------------------------------------------------------------|--------------------------------------------------------------|------|
| Total | 36,516                                                                    | 19,296                                                       | 52.8 |
| 2001  | 501                                                                       | 271                                                          | 54.1 |
| 2002  | 603                                                                       | 346                                                          | 57.4 |
| 2003  | 919                                                                       | 506                                                          | 55.1 |
| 2004  | 1,018                                                                     | 565                                                          | 55.5 |
| 2005  | 1,098                                                                     | 571                                                          | 52.0 |
| 2006  | 1,247                                                                     | 741                                                          | 59.4 |
| 2007  | 1,460                                                                     | 816                                                          | 55.9 |
| 2008  | 1,631                                                                     | 885                                                          | 54.3 |
| 2009  | 1,532                                                                     | 780                                                          | 50.9 |
| 2010  | 1,603                                                                     | 928                                                          | 57.9 |
| 2011  | 1,520                                                                     | 784                                                          | 51.6 |
| 2012  | 1,773                                                                     | 935                                                          | 52.7 |
| 2013  | 2,024                                                                     | 999                                                          | 49.4 |
| 2014  | 2,545                                                                     | 1,345                                                        | 52.8 |
| 2015  | 2,889                                                                     | 1,528                                                        | 52.9 |
| 2016  | 3,489                                                                     | 1,861                                                        | 53.3 |
| 2017  | 4,046                                                                     | 2,094                                                        | 51.8 |
| 2018  | 4,531                                                                     | 2,338                                                        | 51.6 |
| 2019  | 2,087                                                                     | 1,003                                                        | 48.1 |

## 5. Histogram of age at admission

A histogram showing the distribution of age at admission is shown in Figure 2.

Figure 2: Histogram of age at admission for patients with an opioid-injection associated bacterial infection

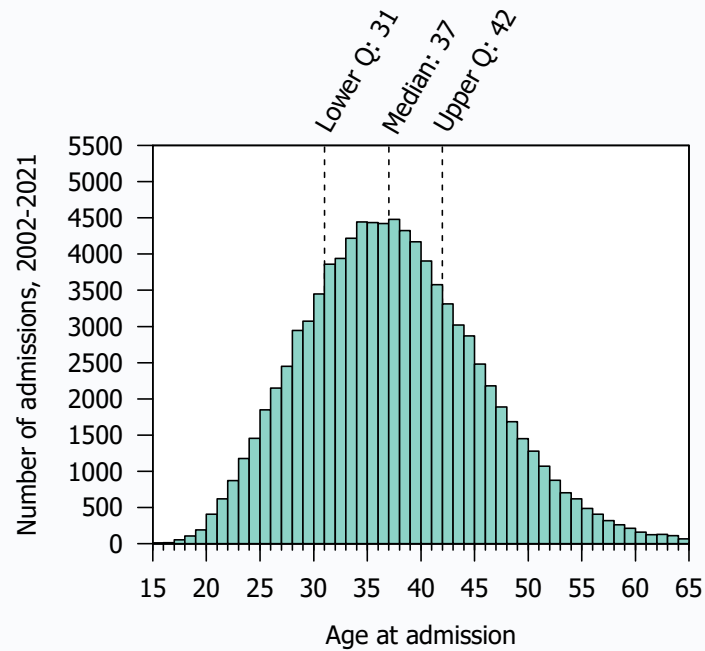

## 6. Characteristics of hospital admissions, stratified by infection type

Table 4: Characteristics of localised infections

| Variable                      | Level                                 | All admissions | All localised infections | Cutaneous abscess | Cellulitis     | Other skin and soft tissue infections | Phlebitis & thrombophlebitis |
|-------------------------------|---------------------------------------|----------------|--------------------------|-------------------|----------------|---------------------------------------|------------------------------|
| Total                         |                                       | 92,303 (100.0) | 79,890 (100.0)           | 29,634 (100.0)    | 20,046 (100.0) | 8,377 (100.0)                         | 21,833 (100.0)               |
| Age group                     | 15-24                                 | 4,898 (5.3)    | 4,414 (5.5)              | 1,667 (5.6)       | 985 (4.9)      | 220 (2.6)                             | 1,542 (7.1)                  |
|                               | 25-34                                 | 32,382 (35.1)  | 28,711 (35.9)            | 10,470 (35.3)     | 6,443 (32.1)   | 2,388 (28.5)                          | 9,410 (43.1)                 |
|                               | 35-44                                 | 38,511 (41.7)  | 33,430 (41.8)            | 12,603 (42.5)     | 8,344 (41.6)   | 3,911 (46.7)                          | 8,572 (39.3)                 |
|                               | 45-54                                 | 14,234 (15.4)  | 11,657 (14.6)            | 4,400 (14.8)      | 3,594 (17.9)   | 1,566 (18.7)                          | 2,097 (9.6)                  |
|                               | 55-64                                 | 2,278 (2.5)    | 1,678 (2.1)              | 494 (1.7)         | 680 (3.4)      | 292 (3.5)                             | 212 (1.0)                    |
|                               | Median [IQR]                          | 37 [31-42]     | 36 [31-42]               | 36 [31-42]        | 37 [32-43]     | 38 [33-44]                            | 34 [30-40]                   |
|                               | Mean [sd]                             | 37.0 [8.2]     | 36.7 [8.1]               | 36.7 [7.9]        | 37.8 [8.5]     | 38.7 [8.0]                            | 35.0 [7.5]                   |
| Sex                           | Female                                | 25,944 (28.1)  | 22,301 (27.9)            | 9,451 (31.9)      | 5,212 (26.0)   | 2,002 (23.9)                          | 5,636 (25.8)                 |
|                               | Male                                  | 66,359 (71.9)  | 57,589 (72.1)            | 20,183 (68.1)     | 14,834 (74.0)  | 6,375 (76.1)                          | 16,197 (74.2)                |
| Ethnicity                     | White or White Other                  | 85,809 (93.0)  | 74,249 (92.9)            | 27,450 (92.6)     | 18,605 (92.8)  | 7,836 (93.5)                          | 20,358 (93.2)                |
|                               | Black/African/Caribbean/Black British | 853 (0.9)      | 719 (0.9)                | 291 (1.0)         | 182 (0.9)      | 121 (1.4)                             | 125 (0.6)                    |
|                               | Asian/Asian British                   | 703 (0.8)      | 589 (0.7)                | 261 (0.9)         | 166 (0.8)      | 51 (0.6)                              | 111 (0.5)                    |
|                               | Mixed/Multiple ethnic groups          | 899 (1.0)      | 759 (1.0)                | 309 (1.0)         | 182 (0.9)      | 94 (1.1)                              | 174 (0.8)                    |
|                               | Other or unknown                      | 4,039 (4.4)    | 3,574 (4.5)              | 1,323 (4.5)       | 911 (4.5)      | 275 (3.3)                             | 1,065 (4.9)                  |
| Index of Multiple Deprivation | 1 - most deprived                     | 52,657 (57.0)  | 45,759 (57.3)            | 16,728 (56.4)     | 11,305 (56.4)  | 4,938 (58.9)                          | 12,788 (58.6)                |
|                               | 2                                     | 20,403 (22.1)  | 17,648 (22.1)            | 6,593 (22.2)      | 4,500 (22.4)   | 1,818 (21.7)                          | 4,737 (21.7)                 |
|                               | 3                                     | 10,024 (10.9)  | 8,652 (10.8)             | 3,249 (11.0)      | 2,201 (11.0)   | 920 (11.0)                            | 2,282 (10.5)                 |
|                               | 4                                     | 5,325 (5.8)    | 4,515 (5.7)              | 1,802 (6.1)       | 1,103 (5.5)    | 412 (4.9)                             | 1,198 (5.5)                  |
|                               | 5 - least deprived                    | 2,746 (3.0)    | 2,324 (2.9)              | 899 (3.0)         | 623 (3.1)      | 199 (2.4)                             | 603 (2.8)                    |
|                               | Missing                               | 1,148 (1.2)    | 992 (1.2)                | 363 (1.2)         | 314 (1.6)      | 90 (1.1)                              | 225 (1.0)                    |
| Homelessness                  |                                       | 7,602 (8.2)    | 6,450 (8.1)              | 2,110 (7.1)       | 1,823 (9.1)    | 1,125 (13.4)                          | 1,392 (6.4)                  |
| Discharge method              | With clinical advice                  | 73,598 (79.7)  | 65,212 (81.6)            | 24,138 (81.5)     | 15,881 (79.2)  | 6,485 (77.4)                          | 18,708 (85.7)                |
|                               | Before medically advised              | 14,899 (16.1)  | 12,628 (15.8)            | 4,856 (16.4)      | 3,557 (17.7)   | 1,607 (19.2)                          | 2,608 (11.9)                 |
|                               | Died                                  | 732 (0.8)      | 95 (0.1)                 | 34 (0.1)          | 25 (0.1)       | 19 (0.2)                              | 17 (0.1)                     |
|                               | Other                                 | 3,074 (3.3)    | 1,955 (2.4)              | 606 (2.0)         | 583 (2.9)      | 266 (3.2)                             | 500 (2.3)                    |
| Duration (days)               | Median [IQR]                          | 3 [1-5]        | 2 [1-5]                  | 3 [2-6]           | 2 [1-4]        | 2 [1-6]                               | 2 [1-4]                      |
|                               | Mean [sd]                             | 4.8 [6.9]      | 4.2 [5.6]                | 4.8 [5.6]         | 3.7 [4.7]      | 4.9 [7.8]                             | 3.6 [5.1]                    |
| Operative procedure           |                                       | 31,283 (33.9)  | 24,398 (30.5)            | 16,528 (55.8)     | 3,186 (15.9)   | 1,664 (19.9)                          | 3,020 (13.8)                 |
| 28-day readmission            |                                       | 17,366 (18.8)  | 15,058 (18.8)            | 4,979 (16.8)      | 3,833 (19.1)   | 1,818 (21.7)                          | 4,428 (20.3)                 |

IQR = interquartile range; sd = standard deviation



Table 5: Characteristics of invasive infections

| Variable                      | Level                                 | All admissions | All invasive infections | Endocarditis  | Septicaemia   | Osteomyelitis & septic arthritis | Necrotising fasciitis |
|-------------------------------|---------------------------------------|----------------|-------------------------|---------------|---------------|----------------------------------|-----------------------|
| Total                         |                                       | 92,303 (100.0) | 12,413 (100.0)          | 2,152 (100.0) | 6,087 (100.0) | 3,905 (100.0)                    | 269 (100.0)           |
| Age group                     | 15-24                                 | 4,898 (5.3)    | 484 (3.9)               | 90-100*       | 242 (4.0)     | 144 (3.7)                        | <10*                  |
|                               | 25-34                                 | 32,382 (35.1)  | 3,671 (29.6)            | 812 (37.7)    | 1,654 (27.2)  | 1,159 (29.7)                     | 46 (17.1)             |
|                               | 35-44                                 | 38,511 (41.7)  | 5,081 (40.9)            | 882 (41.0)    | 2,384 (39.2)  | 1,688 (43.2)                     | 127 (47.2)            |
|                               | 45-54                                 | 14,234 (15.4)  | 2,577 (20.8)            | 320 (14.9)    | 1,401 (23.0)  | 772 (19.8)                       | 84 (31.2)             |
|                               | 55-64                                 | 2,278 (2.5)    | 600 (4.8)               | 40-50*        | 406 (6.7)     | 142 (3.6)                        | <10*                  |
|                               | Median [IQR]                          | 37 [31-42]     | 38 [32-45]              | 36 [31-42]    | 39 [33-46]    | 38 [33-44]                       | 42 [35-46]            |
|                               | Mean [sd]                             | 37.0 [8.2]     | 38.8 [8.8]              | 36.6 [7.9]    | 39.6 [9.2]    | 38.5 [8.4]                       | 41.3 [7.5]            |
| Sex                           | Female                                | 25,944 (28.1)  | 3,643 (29.3)            | 627 (29.1)    | 1,939 (31.9)  | 983 (25.2)                       | 94 (34.9)             |
|                               | Male                                  | 66,359 (71.9)  | 8,770 (70.7)            | 1,525 (70.9)  | 4,148 (68.1)  | 2,922 (74.8)                     | 175 (65.1)            |
| Ethnicity                     | White or White Other                  | 85,809 (93.0)  | 11,560 (93.1)           | 2,005 (93.2)  | 5,649 (92.8)  | 3,650 (93.5)                     | 256 (95.2)            |
|                               | Black/African/Caribbean/Black British | 853 (0.9)      | 134 (1.1)               | 20-30*        | 60 (1.0)      | 48 (1.2)                         | <10*                  |
|                               | Asian/Asian British                   | 703 (0.8)      | 114 (0.9)               | 10-20*        | 79 (1.3)      | 22 (0.6)                         | <10*                  |
|                               | Mixed/Multiple ethnic groups          | 899 (1.0)      | 140 (1.1)               | 30-40*        | 59 (1.0)      | 44 (1.1)                         | <10*                  |
|                               | Other or unknown                      | 4,039 (4.4)    | 465 (3.7)               | 70-80*        | 240 (3.9)     | 141 (3.6)                        | <10*                  |
| Index of Multiple Deprivation | 1 - most deprived                     | 52,657 (57.0)  | 6,898 (55.6)            | 1,178 (54.7)  | 3,313 (54.4)  | 2,262 (57.9)                     | 145 (53.9)            |
|                               | 2                                     | 20,403 (22.1)  | 2,755 (22.2)            | 488 (22.7)    | 1,379 (22.7)  | 831 (21.3)                       | 57 (21.2)             |
|                               | 3                                     | 10,024 (10.9)  | 1,372 (11.1)            | 239 (11.1)    | 693 (11.4)    | 396 (10.1)                       | 44 (16.4)             |
|                               | 4                                     | 5,325 (5.8)    | 810 (6.5)               | 137 (6.4)     | 408 (6.7)     | 250 (6.4)                        | 15 (5.6)              |
|                               | 5 - least deprived                    | 2,746 (3.0)    | 422 (3.4)               | 80-90*        | 216 (3.5)     | 113 (2.9)                        | <10*                  |
|                               | Missing                               | 1,148 (1.2)    | 156 (1.3)               | 20-30*        | 78 (1.3)      | 53 (1.4)                         | <10*                  |
| Homelessness                  |                                       | 7,602 (8.2)    | 1,152 (9.3)             | 194 (9.0)     | 504 (8.3)     | 432 (11.1)                       | 22 (8.2)              |
| Discharge method              | With clinical advice                  | 73,598 (79.7)  | 8,386 (67.6)            | 1,363 (63.3)  | 3,776 (62.0)  | 3,044 (78.0)                     | 203 (75.5)            |
|                               | Before medically advised              | 14,899 (16.1)  | 2,271 (18.3)            | 425 (19.7)    | 1,105 (18.2)  | 718 (18.4)                       | 23 (8.6)              |
|                               | Died                                  | 732 (0.8)      | 637 (5.1)               | 192 (8.9)     | 405 (6.7)     | 10 (0.3)                         | 30 (11.2)             |
|                               | Other                                 | 3,074 (3.3)    | 1,119 (9.0)             | 172 (8.0)     | 801 (13.2)    | 133 (3.4)                        | 13 (4.8)              |
| Duration (days)               | Median [IQR]                          | 3 [1-5]        | 6 [3-14]                | 7 [3-21]      | 4 [2-10]      | 8 [3-15]                         | 14 [6-24]             |
|                               | Mean [sd]                             | 4.8 [6.9]      | 10.7 [13.2]             | 14.8 [18.5]   | 8.1 [10.5]    | 11.4 [12.8]                      | 18.0 [15.8]           |
| Operative procedure           |                                       | 31,283 (33.9)  | 6,885 (55.5)            | 1,183 (55.0)  | 2,832 (46.5)  | 2,639 (67.6)                     | 231 (85.9)            |
| 28-day readmission            |                                       | 17,366 (18.8)  | 2,308 (18.6)            | 433 (20.1)    | 1,152 (18.9)  | 681 (17.4)                       | 42 (15.6)             |

IQR = interquartile range; sd = standard deviation

\* Redacted to prevent disclosure of small cell counts

## 7. Characteristics of hospital admissions, stratified by year of admission

Table 6: Characteristics of admissions by year, 2002-2008

| Variable             | Level                                 | Total          | 2002          | 2003          | 2004          | 2005          | 2006          | 2007          | 2008          |
|----------------------|---------------------------------------|----------------|---------------|---------------|---------------|---------------|---------------|---------------|---------------|
| Total                |                                       | 92,303 (100.0) | 3,827 (100.0) | 5,100 (100.0) | 4,599 (100.0) | 4,093 (100.0) | 4,147 (100.0) | 3,935 (100.0) | 3,970 (100.0) |
| Age group            | 15-24                                 | 4,898 (5.3)    | 667 (17.4)    | 869 (17.0)    | 649 (14.1)    | 441 (10.8)    | 382 (9.2)     | 298 (7.6)     | 257 (6.5)     |
|                      | 25-34                                 | 32,382 (35.1)  | 2,042 (53.4)  | 2,719 (53.3)  | 2,373 (51.6)  | 2,065 (50.5)  | 2,035 (49.1)  | 1,822 (46.3)  | 1,711 (43.1)  |
|                      | 35-44                                 | 38,511 (41.7)  | 937 (24.5)    | 1,311 (25.7)  | 1,314 (28.6)  | 1,327 (32.4)  | 1,452 (35.0)  | 1,493 (37.9)  | 1,614 (40.7)  |
|                      | 45-54                                 | 14,234 (15.4)  | 172 (4.5)     | 183 (3.6)     | 237 (5.2)     | 243 (5.9)     | 245 (5.9)     | 282 (7.2)     | 335 (8.4)     |
|                      | 55-64                                 | 2,278 (2.5)    | 9 (0.2)       | 18 (0.4)      | 26 (0.6)      | 17 (0.4)      | 33 (0.8)      | 40 (1.0)      | 53 (1.3)      |
|                      | Median [IQR]                          | 37 [31-42]     | 31 [26-36]    | 31 [26-36]    | 31 [27-37]    | 32 [28-38]    | 33 [28-38]    | 34 [29-39]    | 35 [29-40]    |
|                      | Mean [sd]                             | 37.0 [8.2]     | 31.2 [7.1]    | 31.2 [6.8]    | 32.2 [7.2]    | 33.0 [7.0]    | 33.5 [7.2]    | 34.2 [7.3]    | 35.0 [7.4]    |
| Sex                  | Female                                | 25,944 (28.1)  | 1,102 (28.8)  | 1,426 (28.0)  | 1,340 (29.1)  | 1,103 (26.9)  | 1,081 (26.1)  | 1,113 (28.3)  | 1,112 (28.0)  |
|                      | Male                                  | 66,359 (71.9)  | 2,725 (71.2)  | 3,674 (72.0)  | 3,259 (70.9)  | 2,990 (73.1)  | 3,066 (73.9)  | 2,822 (71.7)  | 2,858 (72.0)  |
| Ethnicity            | White or White Other                  | 85,809 (93.0)  | 3,408 (89.1)  | 4,367 (85.6)  | 4,051 (88.1)  | 3,679 (89.9)  | 3,823 (92.2)  | 3,612 (91.8)  | 3,736 (94.1)  |
|                      | Black/African/Caribbean/Black British | 853 (0.9)      | 29 (0.8)      | 52 (1.0)      | 33 (0.7)      | 46 (1.1)      | 42 (1.0)      | 48 (1.2)      | 21 (0.5)      |
|                      | Asian/Asian British                   | 703 (0.8)      | 14 (0.4)      | 25 (0.5)      | 20 (0.4)      | 20 (0.5)      | 21 (0.5)      | 27 (0.7)      | 23 (0.6)      |
|                      | Mixed/Multiple ethnic groups          | 899 (1.0)      | 21 (0.5)      | 37 (0.7)      | 36 (0.8)      | 35 (0.9)      | 30 (0.7)      | 31 (0.8)      | 36 (0.9)      |
|                      | Other or unknown                      | 4,039 (4.4)    | 355 (9.3)     | 619 (12.1)    | 459 (10.0)    | 313 (7.6)     | 231 (5.6)     | 217 (5.5)     | 154 (3.9)     |
| Index of Deprivation | 1 - most deprived                     | 52,657 (57.0)  | 2,357 (61.6)  | 3,074 (60.3)  | 2,787 (60.6)  | 2,479 (60.6)  | 2,475 (59.7)  | 2,308 (58.7)  | 2,196 (55.3)  |
|                      | Multiple                              | 20,403 (22.1)  | 738 (19.3)    | 1,011 (19.8)  | 962 (20.9)    | 785 (19.2)    | 819 (19.7)    | 872 (22.2)    | 863 (21.7)    |
|                      | 3                                     | 10,024 (10.9)  | 305 (8.0)     | 478 (9.4)     | 410 (8.9)     | 390 (9.5)     | 417 (10.1)    | 371 (9.4)     | 476 (12.0)    |
|                      | 4                                     | 5,325 (5.8)    | 191 (5.0)     | 245 (4.8)     | 213 (4.6)     | 218 (5.3)     | 230 (5.5)     | 227 (5.8)     | 268 (6.8)     |
|                      | 5 - least deprived                    | 2,746 (3.0)    | 80 (2.1)      | 119 (2.3)     | 101 (2.2)     | 101 (2.5)     | 118 (2.8)     | 111 (2.8)     | 126 (3.2)     |
|                      | Missing                               | 1,148 (1.2)    | 156 (4.1)     | 173 (3.4)     | 126 (2.7)     | 120 (2.9)     | 88 (2.1)      | 46 (1.2)      | 41 (1.0)      |
| Homelessness         |                                       | 7,602 (8.2)    | 307 (8.0)     | 385 (7.5)     | 319 (6.9)     | 317 (7.7)     | 261 (6.3)     | 217 (5.5)     | 182 (4.6)     |
| Discharge method     | With clinical advice                  | 73,598 (79.7)  | 2,985 (78.0)  | 4,030 (79.0)  | 3,628 (78.9)  | 3,230 (78.9)  | 3,340 (80.5)  | 3,248 (82.5)  | 3,276 (82.5)  |
|                      | Before medically advised              | 14,899 (16.1)  | 715 (18.7)    | 941 (18.5)    | 831 (18.1)    | 720 (17.6)    | 654 (15.8)    | 572 (14.5)    | 558 (14.1)    |
|                      | Died                                  | 732 (0.8)      | 16 (0.4)      | 24 (0.5)      | 25 (0.5)      | 23 (0.6)      | 19 (0.5)      | 25 (0.6)      | 27 (0.7)      |
|                      | Other                                 | 3,074 (3.3)    | 111 (2.9)     | 105 (2.1)     | 115 (2.5)     | 120 (2.9)     | 134 (3.2)     | 90 (2.3)      | 109 (2.7)     |
| Duration (days)      | Median [IQR]                          | 3 [1-5]        | 4 [2-7]       | 3 [2-7]       | 3 [2-7]       | 3 [2-6]       | 3 [2-5]       | 3 [1-5]       | 3 [1-5]       |
|                      | Mean [sd]                             | 4.8 [6.9]      | 6.4 [8.1]     | 6.1 [9.0]     | 5.7 [7.5]     | 5.5 [7.9]     | 4.8 [6.4]     | 4.7 [6.5]     | 5.0 [8.1]     |
| Operative procedure  |                                       | 31,283 (33.9)  | 966 (25.2)    | 1,487 (29.2)  | 1,342 (29.2)  | 1,096 (26.8)  | 1,053 (25.4)  | 1,140 (29.0)  | 1,210 (30.5)  |
| 28-day readmission   |                                       | 17,366 (18.8)  | 696 (18.2)    | 909 (17.8)    | 758 (16.5)    | 772 (18.9)    | 740 (17.8)    | 680 (17.3)    | 690 (17.4)    |
| Primary diagnosis    | Cutaneous abscess                     | 29,634 (32.1)  | 1,208 (31.6)  | 1,546 (30.3)  | 1,468 (31.9)  | 1,287 (31.4)  | 1,246 (30.0)  | 1,244 (31.6)  | 1,244 (31.3)  |
|                      | Cellulitis                            | 20,046 (21.7)  | 778 (20.3)    | 1,097 (21.5)  | 994 (21.6)    | 847 (20.7)    | 877 (21.1)    | 807 (20.5)    | 810 (20.4)    |
|                      | Other skin and soft tissue infections | 8,377 (9.1)    | 225 (5.9)     | 327 (6.4)     | 291 (6.3)     | 324 (7.9)     | 313 (7.5)     | 307 (7.8)     | 327 (8.2)     |
|                      | Phlebitis and thrombophlebitis        | 21,833 (23.7)  | 1,341 (35.0)  | 1,745 (34.2)  | 1,429 (31.1)  | 1,259 (30.8)  | 1,363 (32.9)  | 1,224 (31.1)  | 1,207 (30.4)  |
|                      | Endocarditis                          | 2,152 (2.3)    | 52 (1.4)      | 84 (1.6)      | 79 (1.7)      | 80 (2.0)      | 89 (2.1)      | 63 (1.6)      | 105 (2.6)     |
|                      | Septicaemia                           | 6,087 (6.6)    | 111 (2.9)     | 172 (3.4)     | 163 (3.5)     | 149 (3.6)     | 128 (3.1)     | 147 (3.7)     | 143 (3.6)     |
|                      | Osteomyelitis or septic arthritis     | 3,905 (4.2)    | 112 (2.9)     | 129 (2.5)     | 175 (3.8)     | 147 (3.6)     | 131 (3.2)     | 143 (3.6)     | 134 (3.4)     |
|                      | Necrotizing fasciitis                 | 269 (0.3)      |               |               |               |               |               |               |               |

IQR = interquartile range; sd = standard deviation

Table 7: Characteristics of admissions by year, 2009-2015

| Variable             | Level                                 | Total          | 2009          | 2010          | 2011          | 2012          | 2013          | 2014          | 2015          |
|----------------------|---------------------------------------|----------------|---------------|---------------|---------------|---------------|---------------|---------------|---------------|
| Total                |                                       | 92,303 (100.0) | 3,590 (100.0) | 3,653 (100.0) | 3,264 (100.0) | 3,352 (100.0) | 3,793 (100.0) | 4,424 (100.0) | 5,074 (100.0) |
| Age group            | 15-24                                 | 4,898 (5.3)    | 186 (5.2)     | 174 (4.8)     | 129 (4.0)     | 109 (3.3)     | 97 (2.6)      | 107 (2.4)     | 99 (2.0)      |
|                      | 25-34                                 | 32,382 (35.1)  | 1,454 (40.5)  | 1,418 (38.8)  | 1,211 (37.1)  | 1,261 (37.6)  | 1,368 (36.1)  | 1,485 (33.6)  | 1,571 (31.0)  |
|                      | 35-44                                 | 38,511 (41.7)  | 1,529 (42.6)  | 1,590 (43.5)  | 1,472 (45.1)  | 1,493 (44.5)  | 1,713 (45.2)  | 1,979 (44.7)  | 2,316 (45.6)  |
|                      | 45-54                                 | 14,234 (15.4)  | 366 (10.2)    | 394 (10.8)    | 379 (11.6)    | 435 (13.0)    | 563 (14.8)    | 763 (17.2)    | 956 (18.8)    |
|                      | 55-64                                 | 2,278 (2.5)    | 55 (1.5)      | 77 (2.1)      | 73 (2.2)      | 54 (1.6)      | 52 (1.4)      | 90 (2.0)      | 132 (2.6)     |
|                      | Median [IQR]                          | 37 [31-42]     | 35 [30-40.75] | 36 [30-41]    | 36 [31-41]    | 36 [31-42]    | 37 [32-42]    | 37 [32-43]    | 38 [33-44]    |
|                      | Mean [sd]                             | 37.0 [8.2]     | 35.7 [7.5]    | 36.1 [7.6]    | 36.7 [7.6]    | 36.8 [7.4]    | 37.2 [7.3]    | 37.9 [7.6]    | 38.5 [7.6]    |
| Sex                  | Female                                | 25,944 (28.1)  | 956 (26.6)    | 973 (26.6)    | 880 (27.0)    | 913 (27.2)    | 1,104 (29.1)  | 1,250 (28.3)  | 1,419 (28.0)  |
|                      | Male                                  | 66,359 (71.9)  | 2,634 (73.4)  | 2,680 (73.4)  | 2,384 (73.0)  | 2,439 (72.8)  | 2,689 (70.9)  | 3,174 (71.7)  | 3,655 (72.0)  |
| Ethnicity            | White or White Other                  | 85,809 (93.0)  | 3,385 (94.3)  | 3,454 (94.6)  | 3,095 (94.8)  | 3,157 (94.2)  | 3,598 (94.9)  | 4,192 (94.8)  | 4,833 (95.3)  |
|                      | Black/African/Caribbean/Black British | 853 (0.9)      | 22 (0.6)      | 35 (1.0)      | 26 (0.8)      | 35 (1.0)      | 38 (1.0)      | 37 (0.8)      | 32 (0.6)      |
|                      | Asian/Asian British                   | 703 (0.8)      | 33 (0.9)      | 30 (0.8)      | 26 (0.8)      | 26 (0.8)      | 18 (0.5)      | 43 (1.0)      | 39 (0.8)      |
|                      | Mixed/Multiple ethnic groups          | 899 (1.0)      | 38 (1.1)      | 30 (0.8)      | 23 (0.7)      | 27 (0.8)      | 28 (0.7)      | 56 (1.3)      | 57 (1.1)      |
|                      | Other or unknown                      | 4,039 (4.4)    | 112 (3.1)     | 104 (2.8)     | 94 (2.9)      | 107 (3.2)     | 111 (2.9)     | 96 (2.2)      | 113 (2.2)     |
| Index of Deprivation | 1 - most deprived                     | 52,657 (57.0)  | 2,100 (58.5)  | 2,064 (56.5)  | 1,852 (56.7)  | 1,891 (56.4)  | 2,102 (55.4)  | 2,534 (57.3)  | 2,894 (57.0)  |
|                      | 2                                     | 20,403 (22.1)  | 772 (21.5)    | 845 (23.1)    | 698 (21.4)    | 744 (22.2)    | 822 (21.7)    | 979 (22.1)    | 1,167 (23.0)  |
|                      | 3                                     | 10,024 (10.9)  | 417 (11.6)    | 402 (11.0)    | 381 (11.7)    | 389 (11.6)    | 468 (12.3)    | 472 (10.7)    | 583 (11.5)    |
|                      | 4                                     | 5,325 (5.8)    | 176 (4.9)     | 218 (6.0)     | 203 (6.2)     | 191 (5.7)     | 251 (6.6)     | 251 (5.7)     | 264 (5.2)     |
|                      | 5 - least deprived                    | 2,746 (3.0)    | 95 (2.6)      | 98 (2.7)      | 102 (3.1)     | 112 (3.3)     | 124 (3.3)     | 167 (3.8)     | 137 (2.7)     |
|                      | Missing                               | 1,148 (1.2)    | 30 (0.8)      | 26 (0.7)      | 28 (0.9)      | 25 (0.7)      | 26 (0.7)      | 21 (0.5)      | 29 (0.6)      |
| Homelessness         |                                       | 7,602 (8.2)    | 131 (3.6)     | 120 (3.3)     | 140 (4.3)     | 152 (4.5)     | 206 (5.4)     | 310 (7.0)     | 387 (7.6)     |
| Discharge method     | With clinical advice                  | 73,598 (79.7)  | 3,009 (83.8)  | 3,114 (85.2)  | 2,726 (83.5)  | 2,776 (82.8)  | 3,156 (83.2)  | 3,608 (81.6)  | 4,056 (79.9)  |
|                      | Before medically advised              | 14,899 (16.1)  | 471 (13.1)    | 438 (12.0)    | 404 (12.4)    | 456 (13.6)    | 486 (12.8)    | 655 (14.8)    | 817 (16.1)    |
|                      | Died                                  | 732 (0.8)      | 22 (0.6)      | 22 (0.6)      | 27 (0.8)      | 24 (0.7)      | 25 (0.7)      | 23 (0.5)      | 31 (0.6)      |
|                      | Other                                 | 3,074 (3.3)    | 88 (2.5)      | 79 (2.2)      | 107 (3.3)     | 96 (2.9)      | 126 (3.3)     | 138 (3.1)     | 170 (3.4)     |
| Duration (days)      | Median [IQR]                          | 3 [1-5]        | 2 [1-5]       | 2 [1-5]       | 2 [1-5]       | 3 [1-5]       | 3 [2-5]       | 2 [1-5]       | 2 [1-5]       |
|                      | Mean [sd]                             | 4.8 [6.9]      | 4.5 [6.6]     | 4.2 [7.1]     | 4.4 [6.3]     | 4.5 [6.0]     | 4.4 [5.9]     | 4.4 [6.0]     | 4.3 [6.3]     |
| Operative procedure  |                                       | 31,283 (33.9)  | 1,070 (29.8)  | 1,192 (32.6)  | 1,050 (32.2)  | 1,128 (33.7)  | 1,363 (35.9)  | 1,539 (34.8)  | 1,834 (36.1)  |
| 28-day readmission   |                                       | 17,366 (18.8)  | 626 (17.4)    | 641 (17.5)    | 593 (18.2)    | 533 (15.9)    | 718 (18.9)    | 827 (18.7)    | 1,002 (19.7)  |
| Primary diagnosis    | Cutaneous abscess                     | 29,634 (32.1)  | 1,131 (31.5)  | 1,196 (32.7)  | 973 (29.8)    | 1,100 (32.8)  | 1,299 (34.2)  | 1,492 (33.7)  | 1,748 (34.5)  |
|                      | Cellulitis                            | 20,046 (21.7)  | 758 (21.1)    | 787 (21.5)    | 748 (22.9)    | 755 (22.5)    | 831 (21.9)    | 970 (21.9)    | 1,095 (21.6)  |
|                      | Other skin and soft tissue infections | 8,377 (9.1)    | 335 (9.3)     | 366 (10.0)    | 366 (11.2)    | 306 (9.1)     | 352 (9.3)     | 440 (9.9)     | 436 (8.6)     |
|                      | Phlebitis and thrombophlebitis        | 21,833 (23.7)  | 1,072 (29.9)  | 1,005 (27.5)  | 892 (27.3)    | 832 (24.8)    | 859 (22.6)    | 951 (21.5)    | 1,059 (20.9)  |
|                      | Endocarditis                          | 2,152 (2.3)    | 71 (2.0)      | 56 (1.5)      | 44 (1.3)      | 78 (2.3)      | 83 (2.2)      | 101 (2.3)     | 161 (3.2)     |
|                      | Septicaemia                           | 6,087 (6.6)    | 114 (3.2)     | 132 (3.6)     | 139 (4.3)     | 133 (4.0)     | 198 (5.2)     | 243 (5.5)     | 308 (6.1)     |
|                      | Osteomyelitis or septic arthritis     | 3,905 (4.2)    | 109 (3.0)     | 111 (3.0)     | 102 (3.1)     | 133 (4.0)     | 150 (4.0)     | 205 (4.6)     | 230 (4.5)     |
|                      | Necrotizing fasciitis                 | 269 (0.3)      |               |               |               | 15 (0.4)      | 21 (0.6)      | 22 (0.5)      | 37 (0.7)      |

IQR = interquartile range; sd = standard deviation

Table 8: Characteristics of admissions by year, 2016-2021

| Variable             | Level                                 | Total          | 2016          | 2017          | 2018          | 2019          | 2020          | 2021          |            |
|----------------------|---------------------------------------|----------------|---------------|---------------|---------------|---------------|---------------|---------------|------------|
| Total                |                                       | 92,303 (100.0) | 5,923 (100.0) | 6,245 (100.0) | 6,734 (100.0) | 6,902 (100.0) | 5,066 (100.0) | 4,612 (100.0) |            |
| Age group            | 15-24                                 | 4,898 (5.3)    | 106 (1.8)     | 83 (1.3)      | 77 (1.1)      | 75 (1.1)      | 59 (1.2)      | 34 (0.7)      |            |
|                      | 25-34                                 | 32,382 (35.1)  | 1,636 (27.6)  | 1,639 (26.2)  | 1,559 (23.2)  | 1,428 (20.7)  | 847 (16.7)    | 738 (16.0)    |            |
|                      | 35-44                                 | 38,511 (41.7)  | 2,816 (47.5)  | 3,022 (48.4)  | 3,228 (47.9)  | 3,284 (47.6)  | 2,467 (48.7)  | 2,154 (46.7)  |            |
|                      | 45-54                                 | 14,234 (15.4)  | 1,188 (20.1)  | 1,311 (21.0)  | 1,652 (24.5)  | 1,774 (25.7)  | 1,398 (27.6)  | 1,358 (29.4)  |            |
|                      | 55-64                                 | 2,278 (2.5)    | 177 (3.0)     | 190 (3.0)     | 218 (3.2)     | 341 (4.9)     | 295 (5.8)     | 328 (7.1)     |            |
|                      | Median [IQR]                          |                | 37 [31-42]    | 38 [34-44]    | 39 [34-44]    | 39 [35-45]    | 40 [35-46]    | 41 [36-47]    | 42 [37-48] |
|                      | Mean [sd]                             |                | 37.0 [8.2]    | 39.0 [7.6]    | 39.2 [7.6]    | 40.0 [7.5]    | 40.8 [7.8]    | 41.6 [7.8]    | 42.2 [7.9] |
| Sex                  | Female                                | 25,944 (28.1)  | 1,636 (27.6)  | 1,872 (30.0)  | 1,967 (29.2)  | 2,030 (29.4)  | 1,397 (27.6)  | 1,270 (27.5)  |            |
|                      | Male                                  | 66,359 (71.9)  | 4,287 (72.4)  | 4,373 (70.0)  | 4,767 (70.8)  | 4,872 (70.6)  | 3,669 (72.4)  | 3,342 (72.5)  |            |
| Ethnicity            | White or White Other                  | 85,809 (93.0)  | 5,609 (94.7)  | 5,866 (93.9)  | 6,347 (94.3)  | 6,512 (94.3)  | 4,750 (93.8)  | 4,335 (94.0)  |            |
|                      | Black/African/Caribbean/Black British | 853 (0.9)      | 63 (1.1)      | 68 (1.1)      | 65 (1.0)      | 57 (0.8)      | 60 (1.2)      | 44 (1.0)      |            |
|                      | Asian/Asian British                   | 703 (0.8)      | 44 (0.7)      | 67 (1.1)      | 59 (0.9)      | 66 (1.0)      | 49 (1.0)      | 53 (1.1)      |            |
|                      | Mixed/Multiple ethnic groups          | 899 (1.0)      | 66 (1.1)      | 65 (1.0)      | 88 (1.3)      | 70 (1.0)      | 73 (1.4)      | 52 (1.1)      |            |
|                      | Other or unknown                      | 4,039 (4.4)    | 141 (2.4)     | 179 (2.9)     | 175 (2.6)     | 197 (2.9)     | 134 (2.6)     | 128 (2.8)     |            |
| Index of Deprivation | 1 - most deprived                     | 52,657 (57.0)  | 3,376 (57.0)  | 3,363 (53.9)  | 3,640 (54.1)  | 3,779 (54.8)  | 2,801 (55.3)  | 2,585 (56.0)  |            |
|                      | 2                                     | 20,403 (22.1)  | 1,303 (22.0)  | 1,494 (23.9)  | 1,618 (24.0)  | 1,660 (24.1)  | 1,181 (23.3)  | 1,070 (23.2)  |            |
|                      | 3                                     | 10,024 (10.9)  | 661 (11.2)    | 751 (12.0)    | 805 (12.0)    | 771 (11.2)    | 582 (11.5)    | 495 (10.7)    |            |
|                      | 4                                     | 5,325 (5.8)    | 356 (6.0)     | 382 (6.1)     | 420 (6.2)     | 414 (6.0)     | 310 (6.1)     | 297 (6.4)     |            |
|                      | 5 - least deprived                    | 2,746 (3.0)    | 201 (3.4)     | 218 (3.5)     | 205 (3.0)     | 224 (3.2)     | 161 (3.2)     | 146 (3.2)     |            |
|                      | Missing                               | 1,148 (1.2)    | 26 (0.4)      | 37 (0.6)      | 46 (0.7)      | 54 (0.8)      | 31 (0.6)      | 19 (0.4)      |            |
| Homelessness         |                                       | 7,602 (8.2)    | 513 (8.7)     | 693 (11.1)    | 951 (14.1)    | 1,021 (14.8)  | 557 (11.0)    | 433 (9.4)     |            |
| Discharge method     | With clinical advice                  | 73,598 (79.7)  | 4,745 (80.1)  | 4,860 (77.8)  | 5,134 (76.2)  | 5,343 (77.4)  | 3,866 (76.3)  | 3,468 (75.2)  |            |
|                      | Before medically advised              | 14,899 (16.1)  | 939 (15.9)    | 1,070 (17.1)  | 1,204 (17.9)  | 1,165 (16.9)  | 911 (18.0)    | 892 (19.3)    |            |
|                      | Died                                  | 732 (0.8)      | 52 (0.9)      | 55 (0.9)      | 83 (1.2)      | 82 (1.2)      | 55 (1.1)      | 72 (1.6)      |            |
|                      | Other                                 | 3,074 (3.3)    | 187 (3.2)     | 260 (4.2)     | 313 (4.6)     | 312 (4.5)     | 234 (4.6)     | 180 (3.9)     |            |
| Duration (days)      | Median [IQR]                          |                | 3 [1-5]       | 2 [1-5]       | 3 [1-5]       | 3 [1-5]       | 2 [1-5]       | 2 [1-5]       |            |
|                      | Mean [sd]                             |                | 4.8 [6.9]     | 4.3 [5.8]     | 4.5 [6.4]     | 4.6 [6.8]     | 4.8 [6.9]     | 4.2 [5.5]     |            |
| Operative procedure  |                                       | 31,283 (33.9)  | 2,221 (37.5)  | 2,508 (40.2)  | 2,632 (39.1)  | 2,619 (37.9)  | 2,010 (39.7)  | 1,823 (39.5)  |            |
| 28-day readmission   |                                       | 17,366 (18.8)  | 1,148 (19.4)  | 1,281 (20.5)  | 1,411 (21.0)  | 1,382 (20.0)  | 1,049 (20.7)  | 910 (19.7)    |            |
| Primary diagnosis    | Cutaneous abscess                     | 29,634 (32.1)  | 2,133 (36.0)  | 2,100 (33.6)  | 2,141 (31.8)  | 2,229 (32.3)  | 1,489 (29.4)  | 1,360 (29.5)  |            |
|                      | Cellulitis                            | 20,046 (21.7)  | 1,286 (21.7)  | 1,186 (19.0)  | 1,458 (21.7)  | 1,594 (23.1)  | 1,254 (24.8)  | 1,114 (24.2)  |            |
|                      | Other skin and soft tissue infections | 8,377 (9.1)    | 548 (9.3)     | 585 (9.4)     | 668 (9.9)     | 785 (11.4)    | 549 (10.8)    | 527 (11.4)    |            |
|                      | Phlebitis and thrombophlebitis        | 21,833 (23.7)  | 1,131 (19.1)  | 993 (15.9)    | 986 (14.6)    | 988 (14.3)    | 765 (15.1)    | 732 (15.9)    |            |
|                      | Endocarditis                          | 2,152 (2.3)    | 178 (3.0)     | 157 (2.5)     | 171 (2.5)     | 198 (2.9)     | 151 (3.0)     | 151 (3.3)     |            |
|                      | Septicaemia                           | 6,087 (6.6)    | 364 (6.1)     | 887 (14.2)    | 903 (13.4)    | 706 (10.2)    | 495 (9.8)     | 452 (9.8)     |            |
|                      | Osteomyelitis or septic arthritis     | 3,905 (4.2)    | 257 (4.3)     | 309 (4.9)     | 382 (5.7)     | 372 (5.4)     | 325 (6.4)     | 249 (5.4)     |            |
|                      | Necrotizing fasciitis                 | 269 (0.3)      | 26 (0.4)      | 28 (0.4)      | 25 (0.4)      | 30 (0.4)      | 38 (0.8)      | 27 (0.6)      |            |

## 8. Comparison between time trends in hospital admissions and time trends in drug-related deaths

Figure 3 shows the rate of hospital admissions due to injection-associated infections per day from the present study, compared to the rate of drug-related deaths per day from published Office for National Statistics data. This is also included in Figure 1 in the main article. Drug-related deaths are defined by the ICD-10 code for the underlying cause of death, and includes deaths due to "Mental and behavioural disorders due to drug use" (F11-F16 and F18-19), "Accidental poisoning by drugs, medicaments and biological substances" (X40-X44), "Intentional self-poisoning by drugs, medicaments and biological substances" (X60-X64), "Assault by drugs, medicaments and biological substances" (X85), and "Poisoning by drugs, medicaments and biological substances, undetermined intent" (Y10-Y14).<sup>10,11</sup>

Figure 3: Rate of hospital admissions due to injection-association infections per day; compared to the rate of drug-related deaths per day. Shaded bands are 95% confidence intervals.

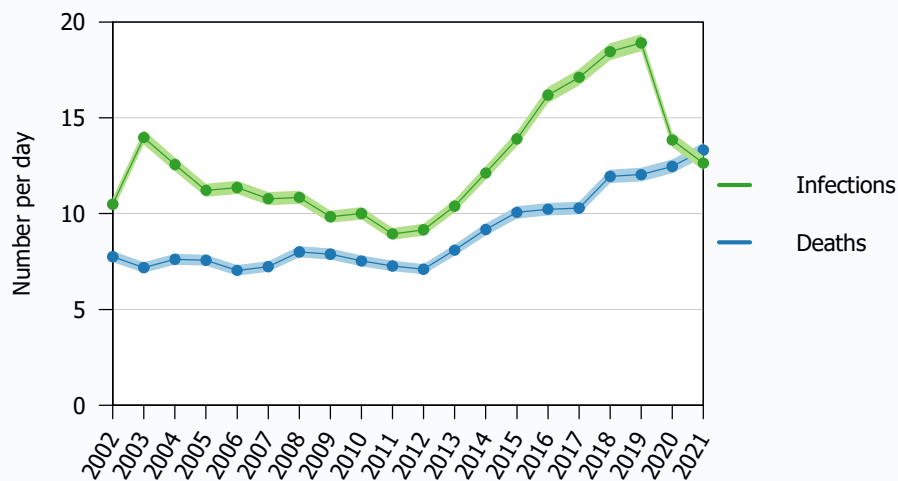

## 9. Additional figures describing the distribution of patient age

Figure 4: Number of hospital admissions due to injection-associated infections per day, by age group

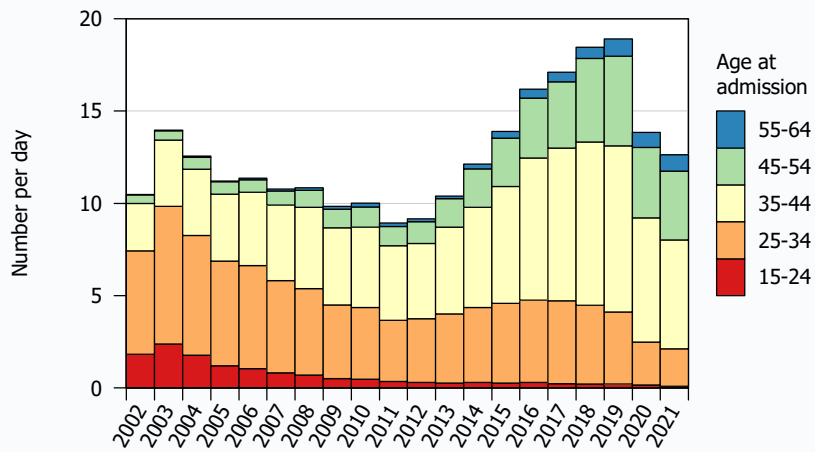

Figure 5: Distribution of age at admission for hospital admissions due to injection-associated infections in England

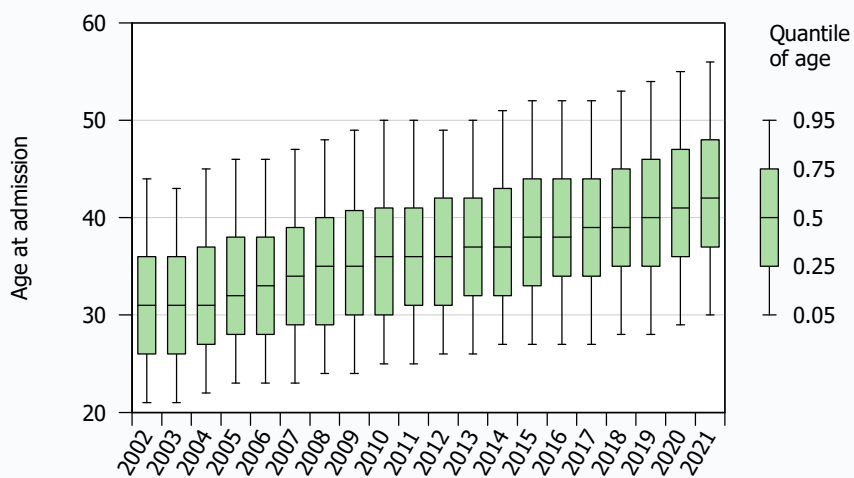

## 10. Figures for time series analyses of invasive infections, skin infections unrelated to opioids, poisoning due to illicit drugs, and mental and behavioural disorders related to illicit drugs

Figure 6: Invasive infections (endocarditis, septicaemia, osteomyelitis and septic arthritis, necrotising fasciitis)

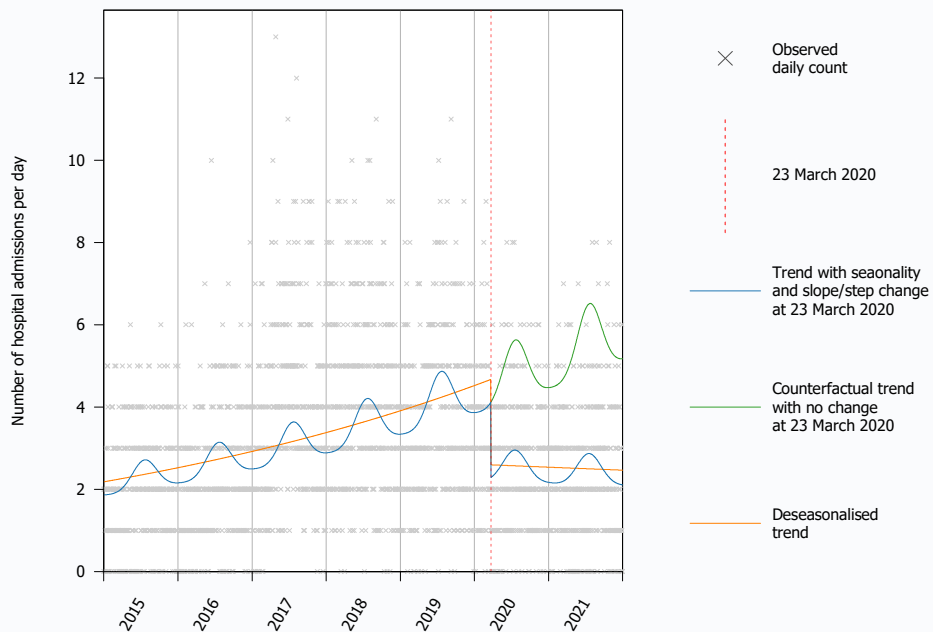

Figure 7: Streptococcal and staphylococcal skin infections that are not related to opioids

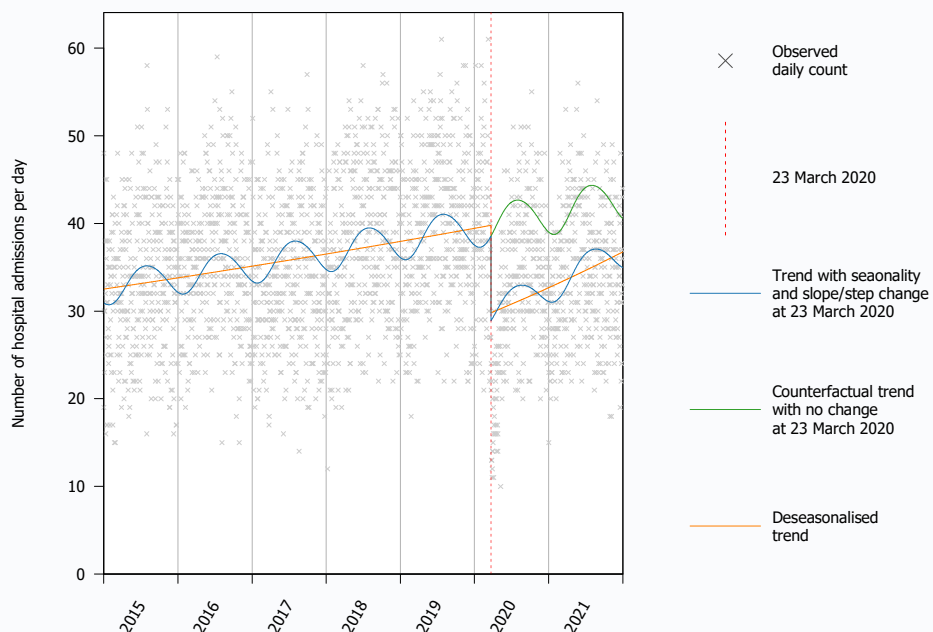

Figure 8: Non-infectious complications of drug use, measure 1 - hospital admissions with a primary diagnosis of drug-related mental and behavioural disorders

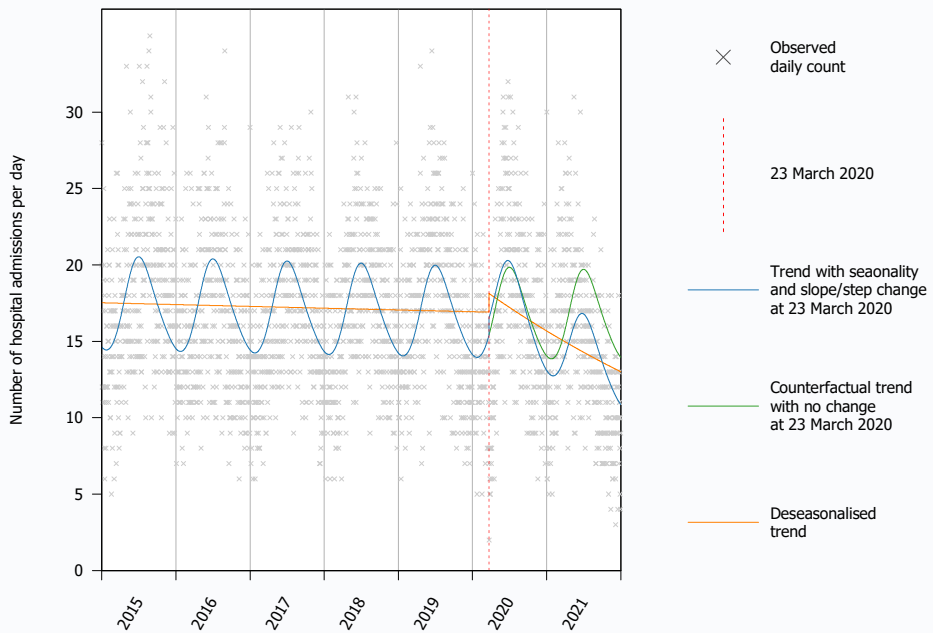

Figure 9: Non-infectious complications of drug use, measure 2 - hospital admissions with a primary diagnosis of poisoning by drugs

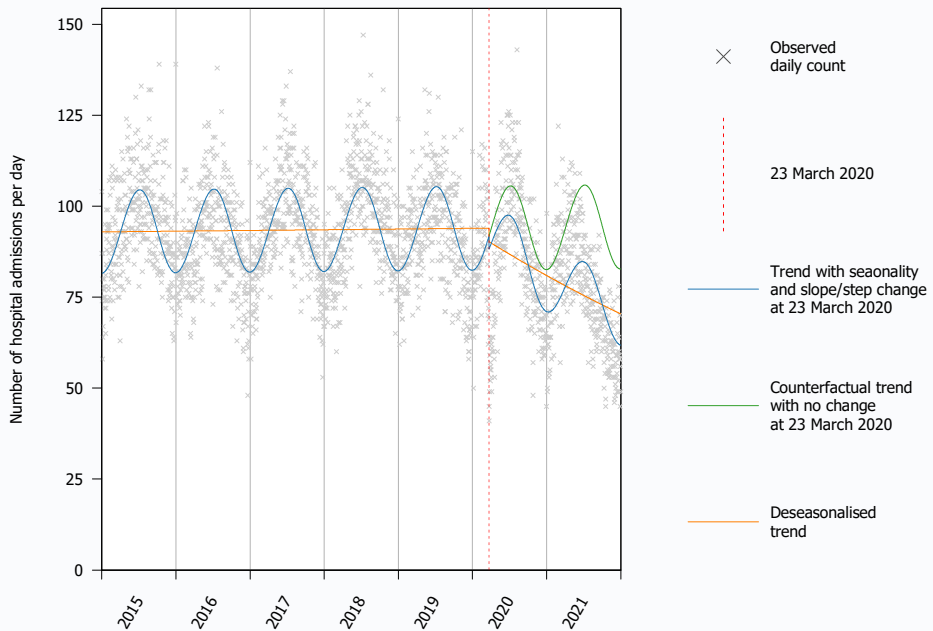



## 11. Coefficients from time series analysis

Table 9: Coefficients from time series model

| Variable                                                                                |             | Incidence rate ratio<br>(95% confidence interval) |
|-----------------------------------------------------------------------------------------|-------------|---------------------------------------------------|
| Intercept (number of admissions on 1 January 2015 and with other variables at baseline) |             | 5.900 (5.253-6.625)                               |
| Slope before 23 March 2020*                                                             |             | 1.069 (1.062-1.077)                               |
| Slope after 23 March 2020†                                                              |             | 0.905 (0.867-0.945)                               |
| Step-change at 23 March 2020                                                            |             | 0.647 (0.616-0.679)                               |
| First harmonic pair                                                                     | Sine term   | 0.960 (0.947-0.974)                               |
|                                                                                         | Cosine term | 1.002 (0.988-1.016)                               |
| Second harmonic pair                                                                    | Sine term   | 0.921 (0.909-0.934)                               |
|                                                                                         | Cosine term | 1.012 (0.998-1.026)                               |

\* Defined as the number of days after 15 January 2015, divided by 365

† Defined as the number of days after 23 March 2020, divided by 365

## 12. References for supplementary material

- 1 Department of Health and Social Care. Technical report on the COVID-19 pandemic in the UK (Chapter 8: non-pharmaceutical interventions). 2022  
<https://www.gov.uk/government/publications/technical-report-on-the-covid-19-pandemic-in-the-uk> (accessed Feb 17, 2023).
- 2 Institute for Government. Timeline of UK government coronavirus lockdowns and restrictions. 2022. <https://www.instituteforgovernment.org.uk/charts/uk-government-coronavirus-lockdowns> (accessed Oct 17, 2022).
- 3 Department for Levelling Up, Housing & Communities. Annex A: Support for people sleeping rough in England, 2021. 2022.  
<https://www.gov.uk/government/statistics/rough-sleeping-snapshot-in-england-autumn-2021/annex-a-support-for-people-sleeping-rough-in-england-2021-not-official-statistics> (accessed Nov 18, 2022).
- 4 Department for Transport, Shapps G. Written statement to Parliament: Traffic light system: safe return to international travel. 2021.  
<https://www.gov.uk/government/speeches/traffic-light-system-safe-return-to-international-travel> (accessed March 7, 2023).
- 5 World Health Organisation. ICD-10 Version:2016. 2016.
- 6 NHS Digital. Statistics on Drug Misuse, England 2020: Part 1: Hospital admissions related to drug misuse. 2021. <https://digital.nhs.uk/data-and-information/publications/statistical/statistics-on-drug-misuse/2020/part-1-hospital-admissions-related-to-drug-misuse> (accessed Nov 17, 2022).
- 7 Herbert A, Wijlaars L, Zylbersztejn A, Cromwell D, Hardelid P. Data Resource Profile: Hospital Episode Statistics Admitted Patient Care (HES APC). *Int J Epidemiol* 2017; **46**: 1093–1093i.
- 8 Lewer D. Improving physical healthcare for people who use heroin and crack cocaine. 2022. <https://doi.org/10.14324/000.th.10145262>.
- 9 Lewer D, Padmanathan P, Qummer ul Arfeen M, *et al*. Healthcare use by people who use illicit opioids (HUPIO): development of a cohort based on electronic primary care records in England [version 1; peer review: 1 approved]. *Wellcome Open Res* 2020; **5**. DOI:10.12688/wellcomeopenres.16431.1.
- 10 Office for National Statistics. Deaths related to drug poisoning in England and Wales: 2021 registrations. 2022.  
<https://www.ons.gov.uk/peoplepopulationandcommunity/birthsdeathsandmarriages/deaths/bulletins/deathsrelatedtodrugpoisoninginenglandandwales/2021registrations> (accessed Sept 16, 2022).
- 11 Office for National Statistics. Deaths related to drug poisoning in England and Wales QMI. 2020.  
<https://www.ons.gov.uk/peoplepopulationandcommunity/birthsdeathsandmarriages/deaths/methodologies/deathsrelatedtodrugpoisoninginenglandandwalesqmi> (accessed Jan 17, 2023).
